# Supplementary material for: Previous crop and rotation history effects on maize seedling health and associated rhizosphere microbiome
Source: PubMed Central journal article supplement (PMC5691165; doi:10.1038/s41598-017-15955-9), 2017-11-16
Supplement: 41598_2017_15955_MOESM1_ESM.pdf [file 41598_2017_15955_MOESM1_ESM.pdf]

**Previous crop and rotation history effects on maize seedling health and associated rhizosphere microbiome**

Maria-Soledad Benitez\*, Shannon L. Osborne, R. Michael Lehman

USDA-ARS, North Central Agricultural Research Laboratory, Brookings, SD 57006

**Supplementary Information**

**Supplementary Table 1.** Primer sets and associated sequences used for MiSeq library preparation in this study.

| <b>16S for MiSeq sequencing</b>  |                                            |                             |                     |
|----------------------------------|--------------------------------------------|-----------------------------|---------------------|
| <b>Primer name</b>               | <b>Overhang (for Nextera kit indexing)</b> | <b>Gene-specific primer</b> | <b>References</b>   |
| 515f modified                    | TCGTCGGCAGCGTCAGATGTGTATAAGAGACAG          | GTGYCAGCMGCCGCGGTAA         | Walters et al 2015  |
| 806r modified                    | GTCTCGTGGGCTCGGAGATGTGTATAAGAGACAG         | GGACTACNVGGGTWTCTAAT        |                     |
| <b>ITS2 for MiSeq sequencing</b> |                                            |                             |                     |
| <b>Primer name</b>               | <b>Overhang (for Nextera kit indexing)</b> | <b>Gene-specific primer</b> |                     |
| ITS3mix1                         | TCGTCGGCAGCGTCAGATGTGTATAAGAGACAG          | CATCGATGAAGAACGCAG          | Tedersoo et al 2014 |
| ITS3mix2                         | TCGTCGGCAGCGTCAGATGTGTATAAGAGACAG          | CAACGATGAAGAACGCAG          |                     |
| ITS3mix3                         | TCGTCGGCAGCGTCAGATGTGTATAAGAGACAG          | CACCGATGAAGAACGCAG          |                     |
| ITS3mix4                         | TCGTCGGCAGCGTCAGATGTGTATAAGAGACAG          | CATCGATGAAGAACGTAG          |                     |
| ITS3mix5                         | TCGTCGGCAGCGTCAGATGTGTATAAGAGACAG          | CATCGATGAAGAACGTGG          |                     |
| ITS3mix10                        | TCGTCGGCAGCGTCAGATGTGTATAAGAGACAG          | CATCGATGAAGAACGCTG          |                     |
| ITS4ngs                          | GTCTCGTGGGCTCGGAGATGTGTATAAGAGACAG         | TCCTSCGCTTATTGATATGC        |                     |

## References

Tedersoo, L. *et al.* Fungal biogeography. Global diversity and geography of soil fungi. *Science* **346**, 1256688 (2014).

Walters, W. *et al.* Improved Bacterial 16S rRNA Gene (V4 and V4-5) and Fungal Internal Transcribed Spacer Marker Gene Primers for Microbial Community Surveys. *mSystems* **1** (2015).



**Supplementary Table 3a.** Illumina MiSeq sequencing summary results for 16S and ITS2 amplicon libraries

| Marker | Sequences per marker | Paired-reads | Sequences used for OTU calling <sup>a</sup> | OTUs <sup>b</sup> | Treatments only sequences <sup>c</sup> | Treatments only OTUs <sup>c</sup> |
|--------|----------------------|--------------|---------------------------------------------|-------------------|----------------------------------------|-----------------------------------|
| 16S    | 19,148,934           | 6,598,118    | 6,023,754                                   | 9,015             | 4,224,557                              | 7,141                             |
| ITS2   | 13,282,922           | 2,821,329    | 1,541,454                                   | 1,505             | 839,315                                | 1,023                             |

<sup>a</sup> PF reads (passed filtered reads)

<sup>b</sup> paired-end sequences >200 nucleotides, quality trimmed, following usearch 8 pipeline and chimera checking

<sup>c</sup> bacterial or fungal (and oomycete) origin only

**Supplementary Table 3b.** Summary of number of OTUs and sequences obtained for each gene region and experiment before and after low abundance filtering

|                 | All OTUs |       | Filtering of low abundance OTUs |           |              |        |       |
|-----------------|----------|-------|---------------------------------|-----------|--------------|--------|-------|
|                 | Samples  | OTUs  | OTUs                            | Sequences | Range        | Median | Mean  |
| <b>16S</b>      |          |       |                                 |           |              |        |       |
| WCR             | 64       | 6,323 | 3,365                           | 954,110   | 8,993-22,643 | 14,768 | 14908 |
| <i>Fusarium</i> | 64       | 6,676 | 4,079                           | 1,547,068 | 6,256-76,631 | 2,2694 | 24173 |
| <b>ITS2</b>     |          |       |                                 |           |              |        |       |
| WCR             | 64       | 622   | 218                             | 66,586    | 147-4,323    | 696    | 1040  |
| <i>Fusarium</i> | 62       | 888   | 508                             | 435,661   | 744-19,118   | 7063   | 7027  |

**Supplementary Table 4.** Relative abundance<sup>a</sup> of *Fusarium graminearum* OTU (Fg\_OTU4) recovered through Illumina MiSeq sequencing of ITS2 amplicon libraries, from maize seedling rhizospheres growing in soils preceded by four different four-year rotation sequences with and without infestation

|                | Non-infested |        |         |           | Infested |         |         |           | Effects     |             |
|----------------|--------------|--------|---------|-----------|----------|---------|---------|-----------|-------------|-------------|
|                | Maize        | Pea    | Soybean | Sunflower | Maize    | Pea     | Soybean | Sunflower | Soil origin | Infestation |
| <b>Fg_OTU4</b> | 2.58 B       | 2.45 B | 4.33 B  | 3.86 B    | 11.82 A  | 12.18 A | 12.15 A | 12.04 A   |             | ***         |

<sup>a</sup> Values represents mean normalized abundance of ITS2 OTU4 recovered from n=8 maize roots (and associated soil). Samples were individually processed for ITS2 amplicon sequencing. Means followed by different letter are significantly different at  $p < 0.1$  after Kruskal-Wallis test. Comparisons between rotation sequences, within infestation level are shown by lower case letters. Comparisons between infested and non-infested counterparts of the same rotation treatment are shown in upper case letters. Absence of letters mean no significance was detected. Significant effects of soil provenance or infestation are shown as \*  $p < 0.1$ , \*\*  $p < 0.05$ , \*\*\*  $p < 0.001$

**Supplementary Tables 5 and 6.** Relative abundance of bacterial amplicons recovered from maize rhizosphere of seedlings growing in soils preceded by four different four-year rotation sequences and exposed to western corn root worm or *Fusarium graminearum* infestation. Suppl. Table 5 summarizes all bacterial phyla recovered and Suppl Table 6 bacteria at different taxonomic rank showing consistent responses to soil provenance across experiments. *See Excel file.*

**Supplementary Table 7.** Relative sequence abundance of bacterial and fungal taxa recovered from maize rhizosphere of seedlings growing in soils preceded by four different four-year rotation sequences which respond to western corn root worm infestation. Differential abundance was tested with data aggregated at different levels of the taxonomic hierarchy. Taxa are arranged from highest to lowest taxonomic rank when differences were observed at different levels. *See Excel file.*

**Supplementary Table 8.** Relative sequence abundance of bacterial and fungal taxa recovered from maize rhizosphere of seedlings growing in soils preceded by four different four-year rotation sequences which respond to infestation with *Fusarium graminearum*. Differential abundance was tested with data aggregated at different levels of the taxonomic hierarchy. Taxa are arranged from highest to lowest taxonomic rank when differences were observed at different levels. *See Excel file.*

**Supplementary Table 9.** Relative sequence abundance of fungal taxa recovered from maize rhizosphere of seedlings growing in soils preceded by four different four-year rotation sequences and exposed to western corn root worm or *Fusarium graminearum* infestation. Differential abundance was tested with data aggregated at different levels of the taxonomic hierarchy. Suppl. Table 9 summarizes all fungal phyla recovered as well as fungal taxa at different taxonomic rank showing consistent responses to soil provenance across experiments. *See Excel file.*

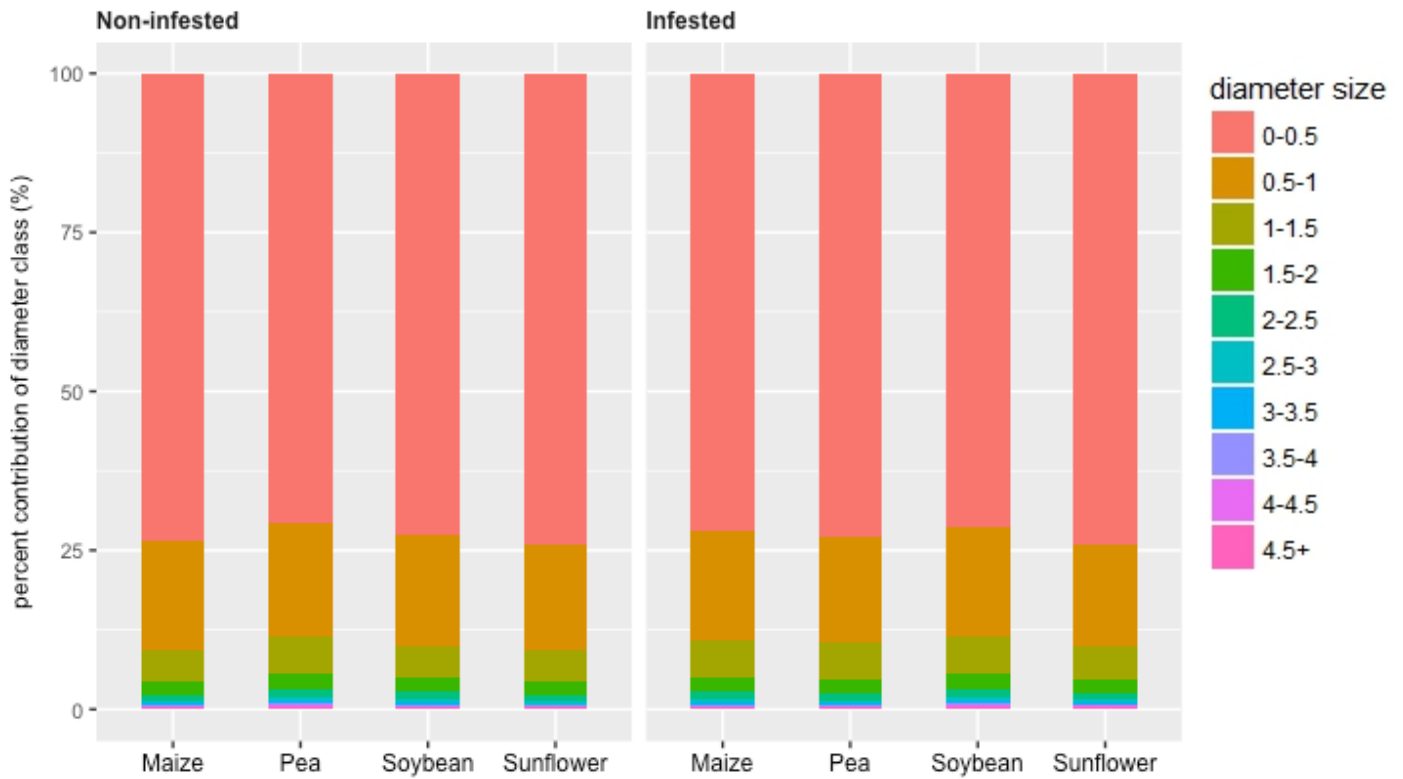

**Supplementary Figure 1.** Percent contribution of root length for different root diameter size classes (mm). Maize seedlings were grown in soils from four different four-year rotation sequences under infestation with *Fusarium graminearum* and roots were scanned and analyzed using WinRhizo software. Cumulative percent for each diameter class size is shown per soil provenance and infestation combination.

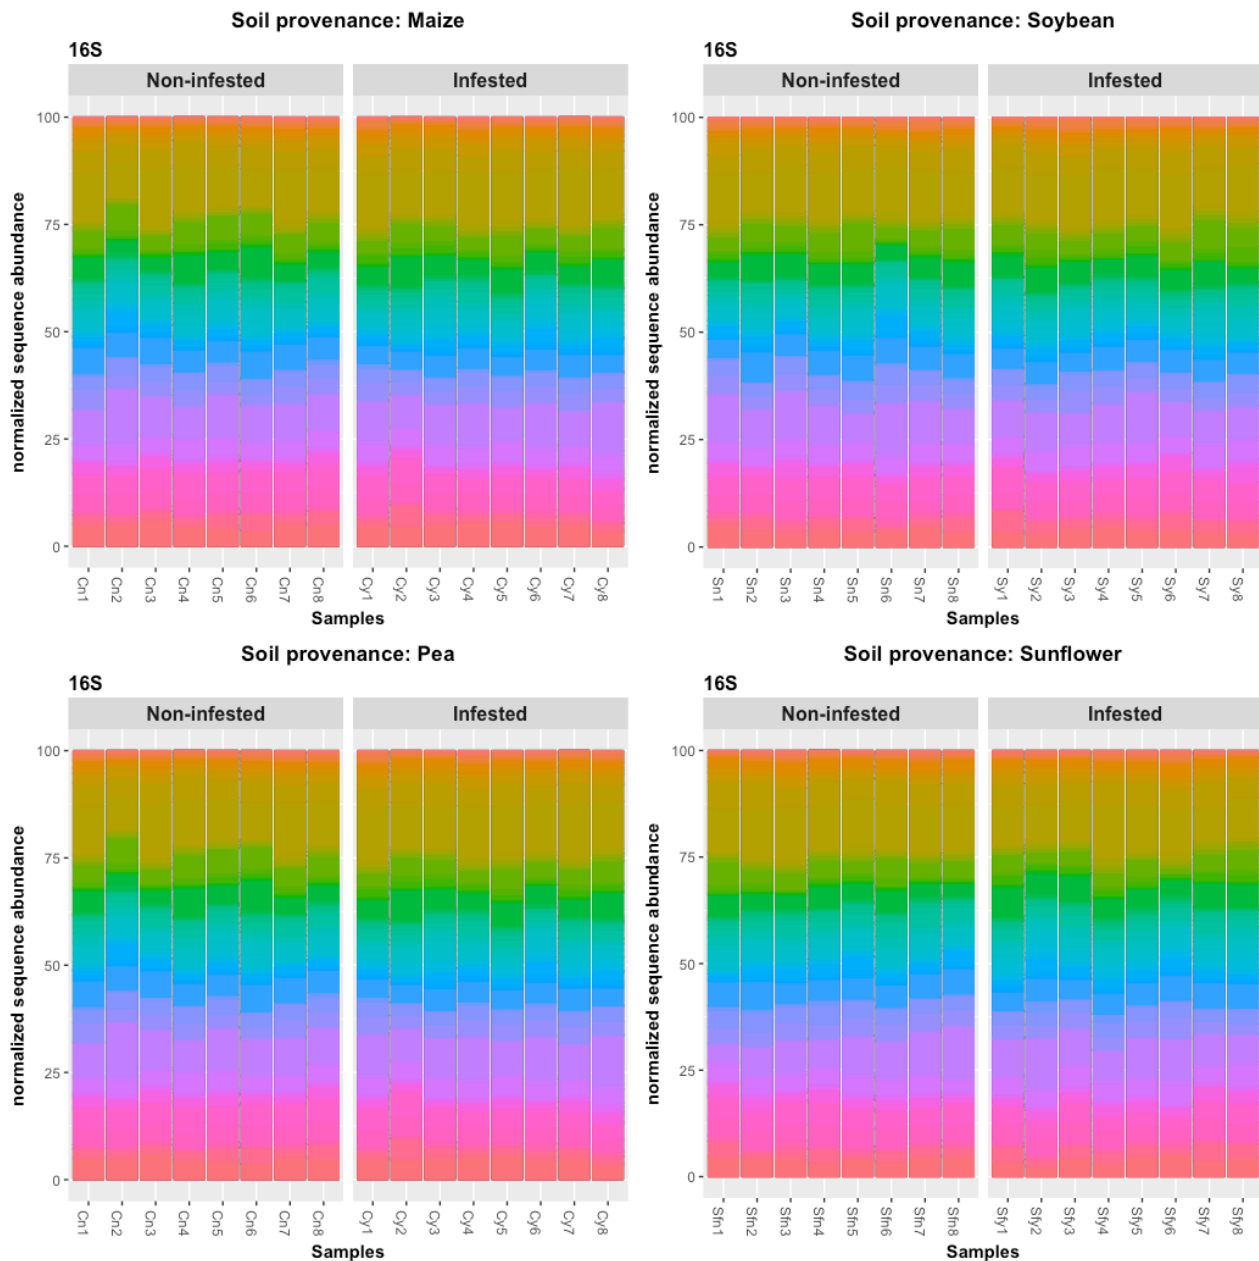

- Family**
- Acetobacteraceae
  - Acidimicrobiaceae
  - Alcaligenaceae
  - Alicyclobacillaceae
  - Alsobacter
  - Armatimonadaceae
  - Bacteriovoraceae
  - Bdellovibrionaceae
  - Bradyrhizobiaceae
  - Brucellaceae
  - Burkholderiaceae
  - Catenulisporaceae
  - Caulobacteraceae
  - Chitinophagaceae
  - Chthonomonadaceae
  - Clostridiaceae\_1
  - Comamonadaceae
  - Coxiellaceae
  - Cryomorphaceae
  - Cystobacteraceae
  - Cytophagaceae
  - Deinococcaceae
  - Enterobacteriaceae
  - Erythrobacteraceae
  - Fimbrimonadaceae
  - Flavobacteriaceae
  - Gaiellaceae
  - Geminicoccus
  - Gemmatimonadaceae
  - Geobacteraceae
  - Geodermatophilaceae
  - Hyphomicrobiaceae
  - Intrasporangiaceae
  - Legionellaceae
  - Leptospiraceae
  - Methylobacteriaceae
  - Methylophilaceae
  - Microbacteriaceae
  - Micrococcaceae
  - Micromonosporaceae
  - Moraxellaceae
  - Motilibacter
  - Mycobacteriaceae
  - Nakamurellaceae
  - Nannocystaceae
  - Nitrososphaera
  - Nitrospiraceae
  - Nocardiaceae
  - Nocardioidaceae
  - Oligoflexaceae
  - Opitutaceae
  - Oxalobacteraceae
  - Paenibacillaceae\_1
  - Phaselocystidaceae
  - Phyllobacteriaceae
  - Planctomycetaceae
  - Propionibacteriaceae
  - Pseudomonadaceae
  - Pseudonocardiaceae
  - Rhizobiaceae
  - Rhodobacteraceae
  - Rhodocyclaceae
  - Rhodospirillaceae
  - Sinobacteraceae
  - Solirubrobacteraceae
  - Sphingobacteriaceae
  - Sphingomonadaceae
  - Sporichthyaceae
  - Streptomycetaceae
  - Streptosporangiaceae
  - Verrucomicrobiaceae
  - Xanthobacteraceae
  - Xanthomonadaceae

**Supplementary Figure 2.** Relative abundance of bacterial (16S) sequences from individual studied samples, aggregated at the family level. Sequences were recovered from the rhizosphere of maize seedlings grown in soils from four different four-year rotation sequences under infestation with western corn rootworm.



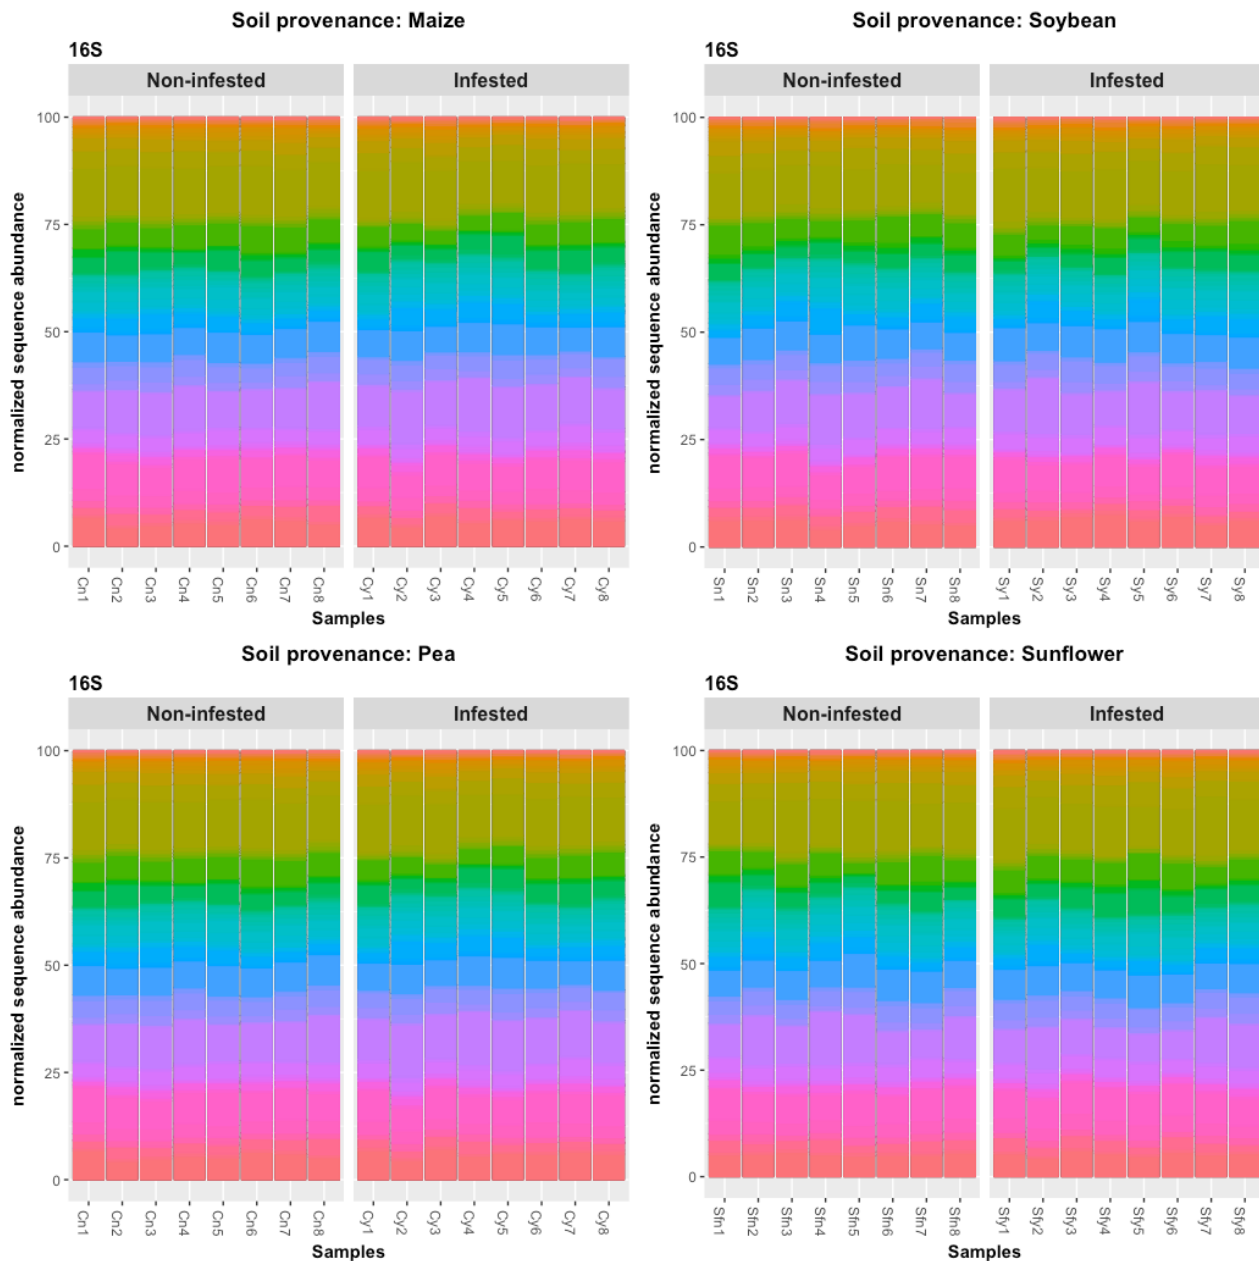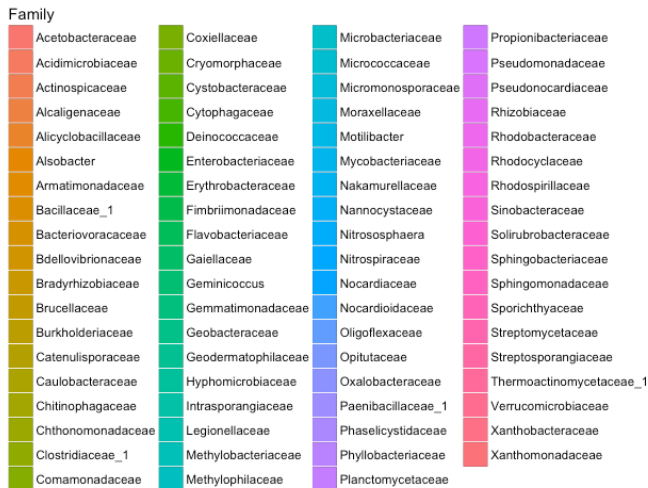

**Supplementary Figure 3.** Relative abundance of bacterial (16S) sequences from individual studied samples, aggregated at the family level. Sequences were recovered from the rhizosphere of maize seedlings grown in soils from four different four-year rotation sequences under infestation with *F. graminearum*.

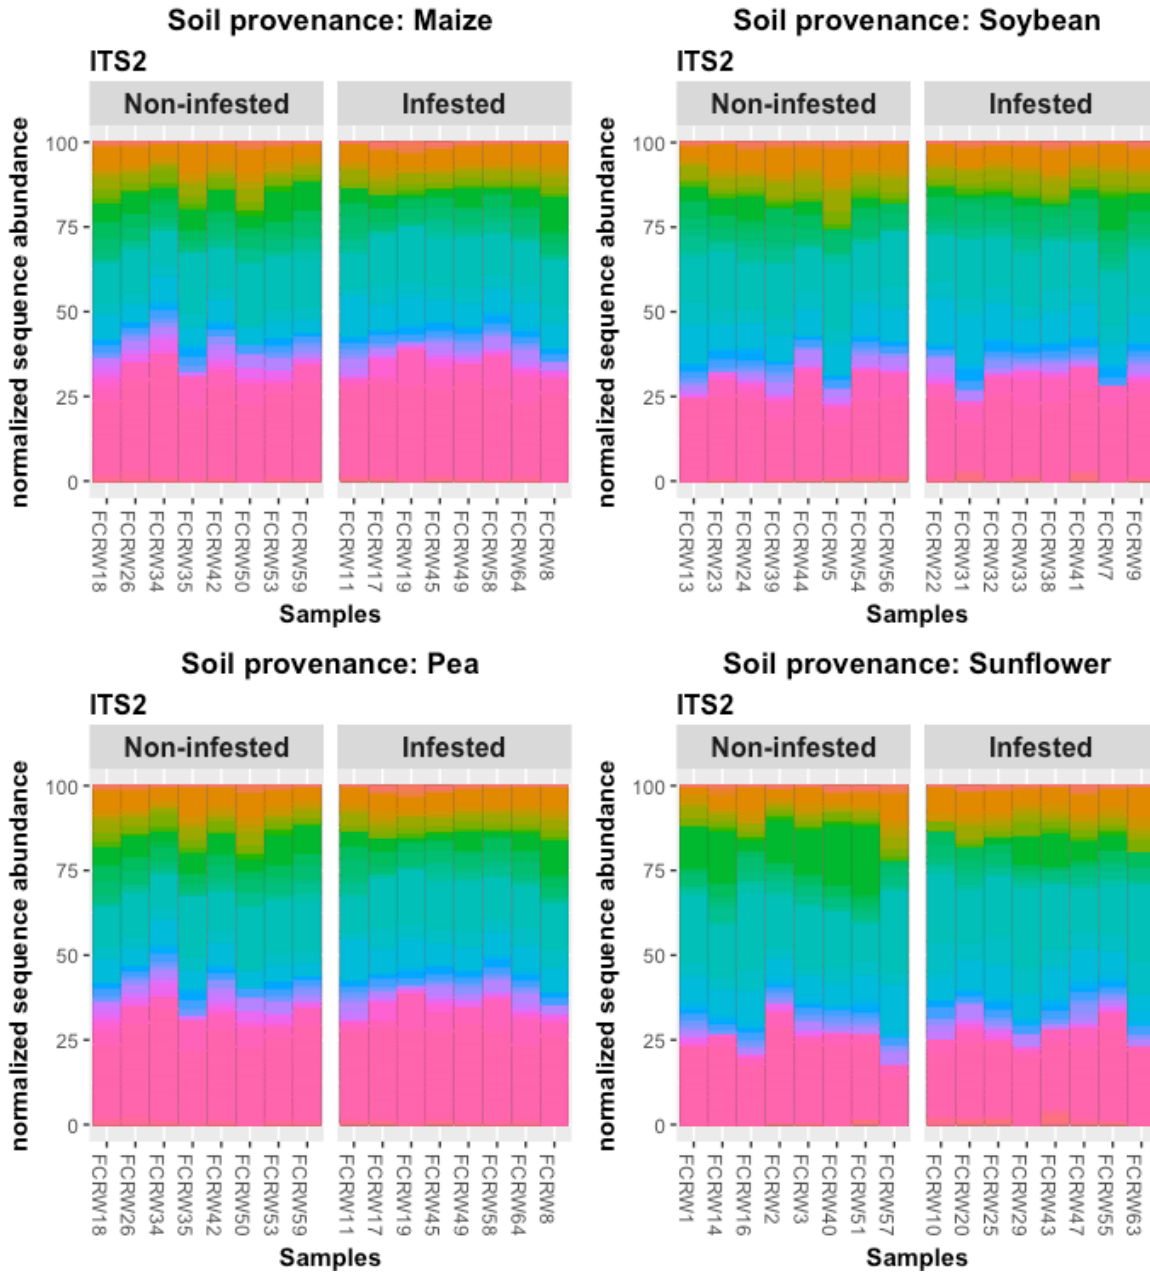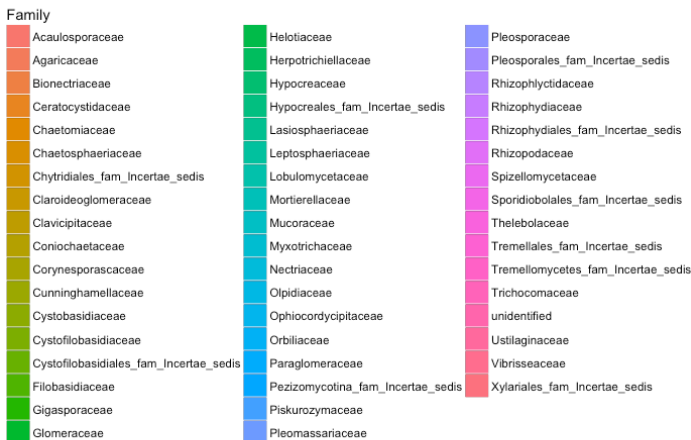

**Supplementary Figure 4.** Relative abundance of fungal (ITS2) sequences from individual studied samples, aggregated at the family level. Sequences were recovered from the rhizosphere of maize seedlings grown in soils from four different four-year rotation sequences under infestation with western corn rootworm.

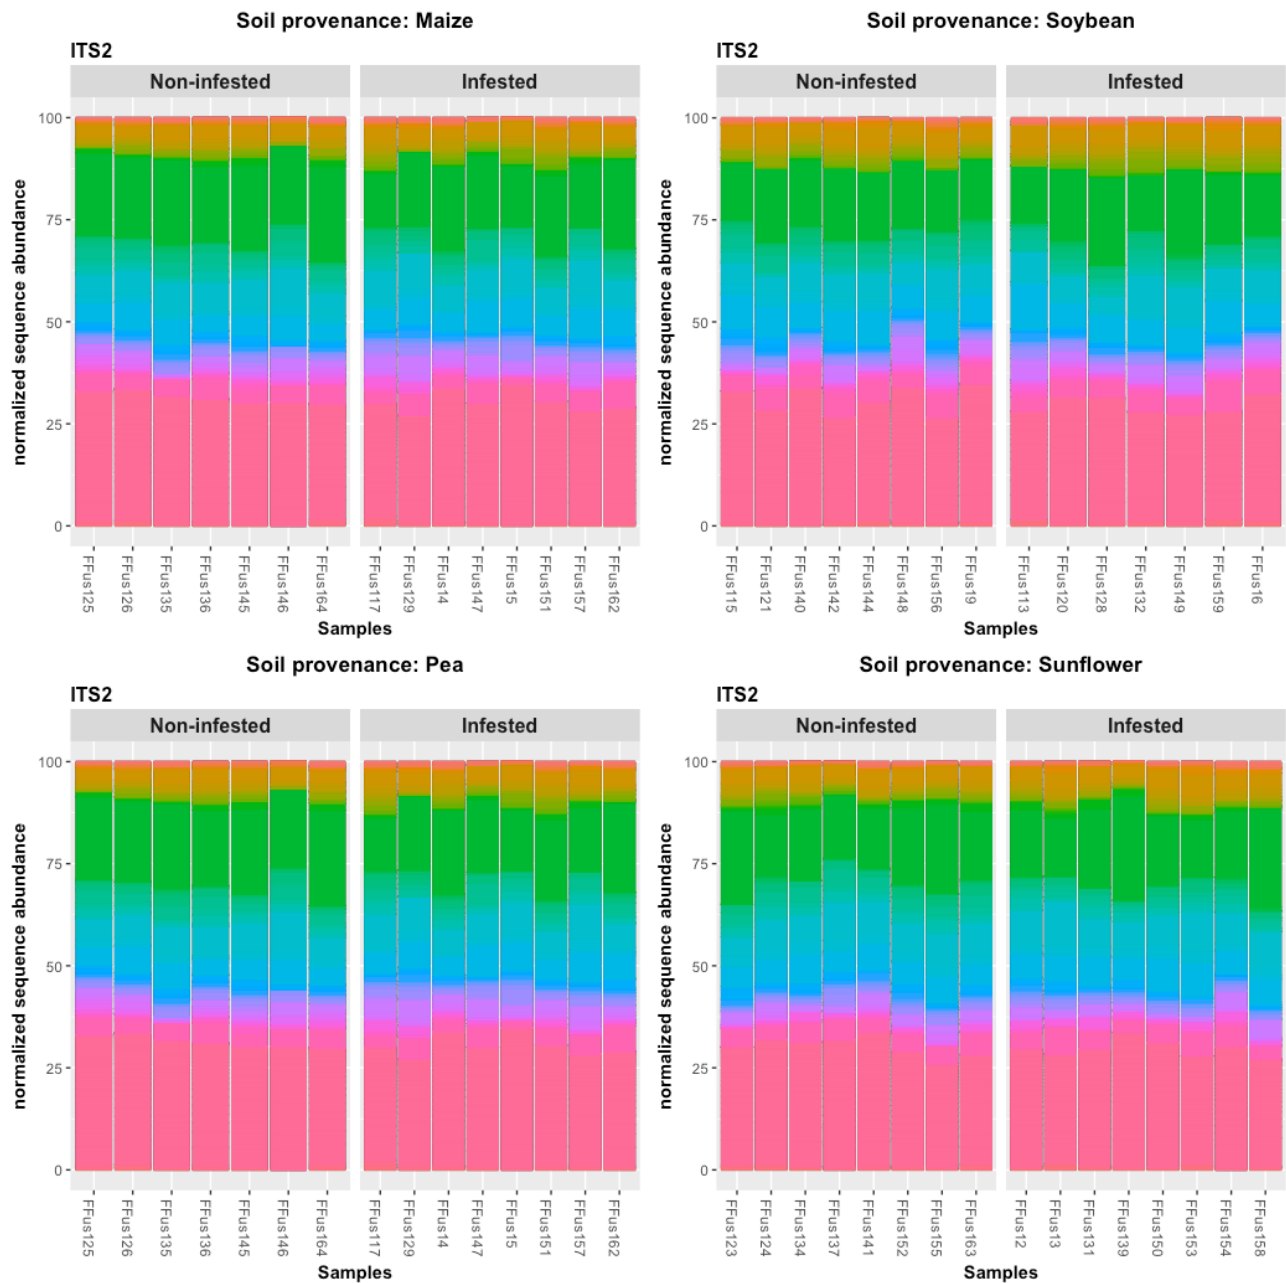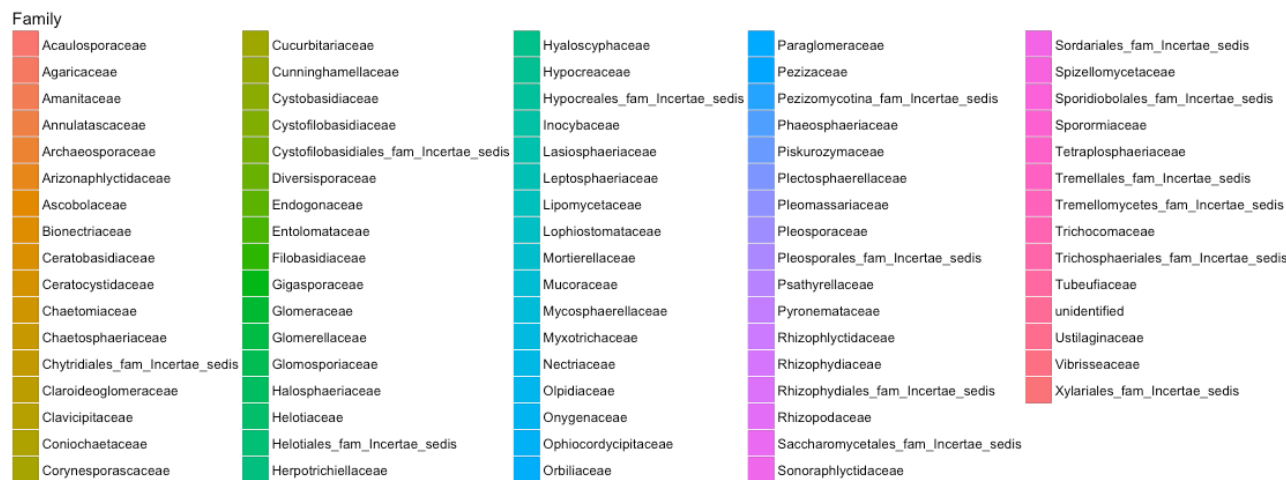

**Supplementary Figure 5.** Relative abundance of fungal (ITS2) sequences from individual studied samples, aggregated at the family level. Sequences were recovered from the rhizosphere of maize seedlings grown in soils from four different four-year rotation sequences under infestation with *F. graminearum*.

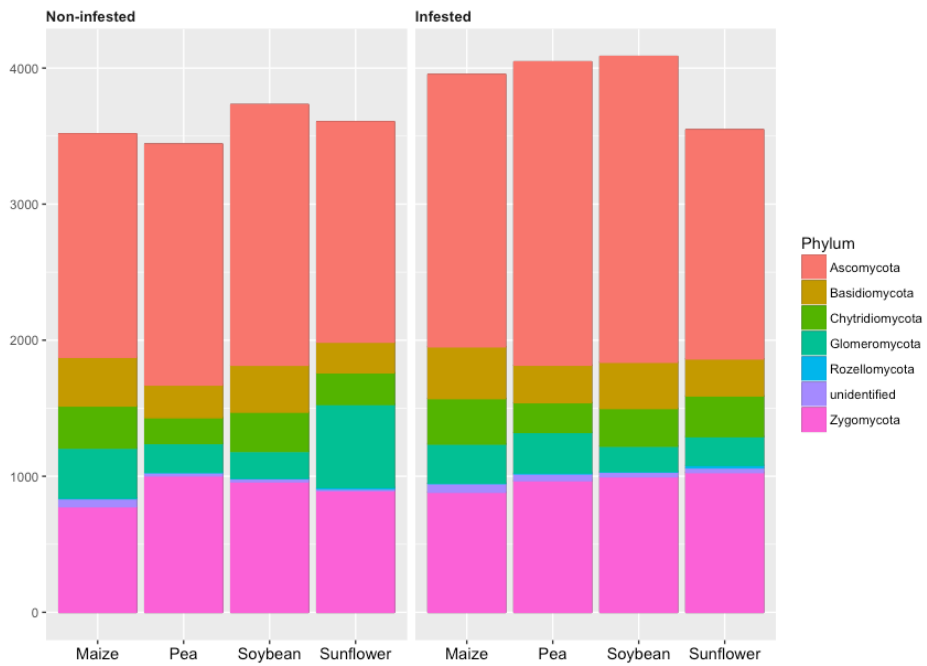

A.

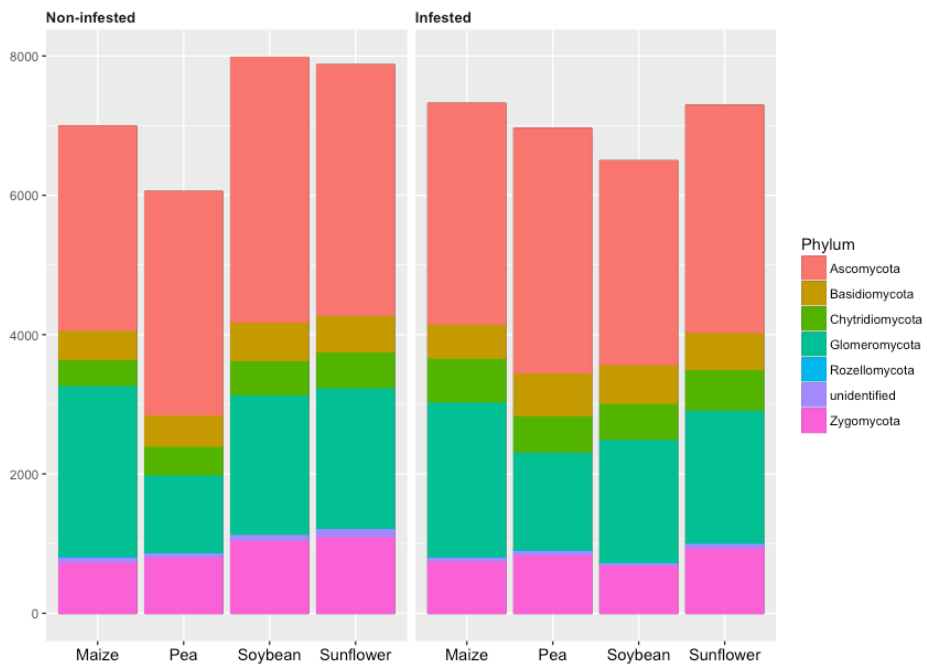

B.

**Supplementary Figure 6.** Relative abundance of fungal (ITS2) sequences aggregated at the phylum level. Sequences were recovered from the rhizosphere of maize seedlings grown in soils from four different four-year rotation sequences under infestation with western corn root worm (A) and infestation with *Fusarium graminearum* (B).

A. Western corn rootworm

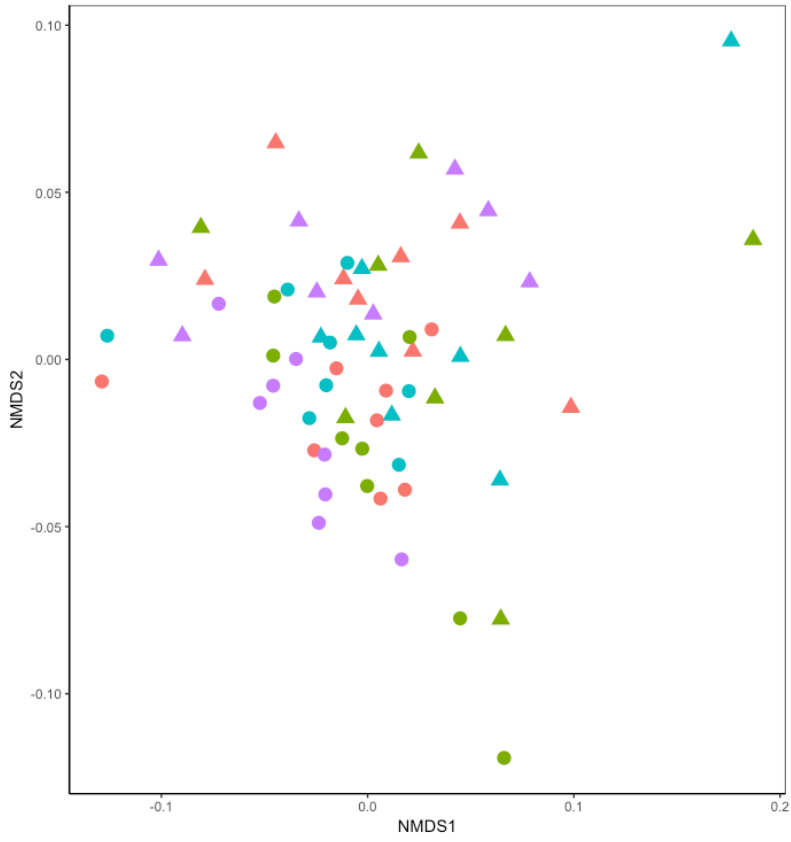

B. Fusarium

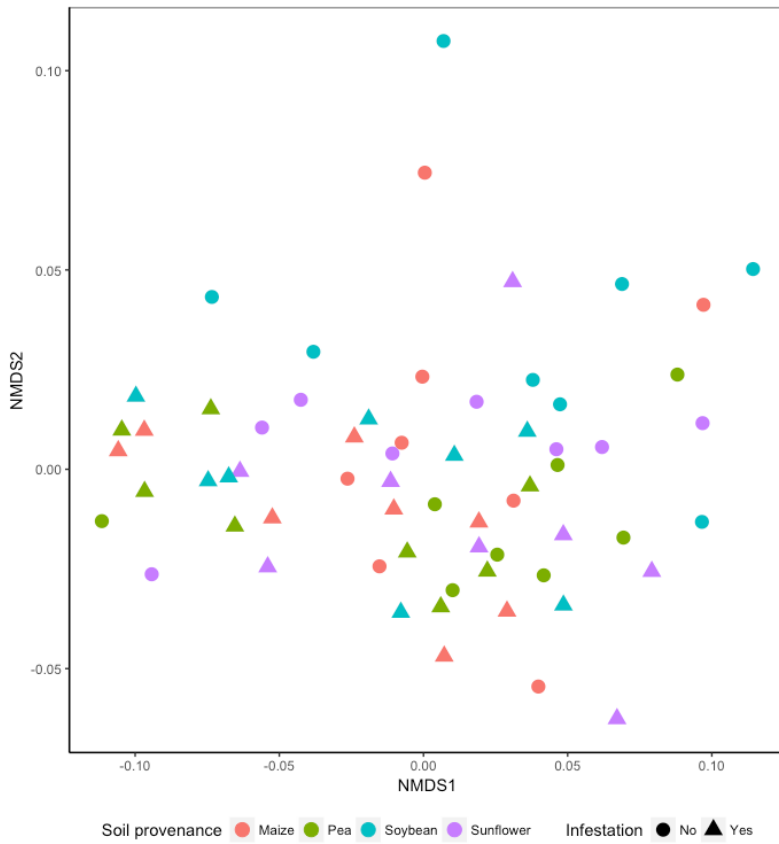

**Supplementary Figure 7.** Soil provenance and infestation effects on predicted metagenome gene content of rhizosphere-associated bacteria recovered from maize seedlings grown in soils from different four-year rotation sequences. Metagenome content prediction was performed using PICRUSt (Langille et al., 2013) after closed reference OTU clustering of 16S amplicon sequence. Ordination was performed based on non-metric multidimensional scaling (NMDS) of Bray-Curtis distance matrices for all samples.

## Supplementary Methods.

### Pipeline used for sequence processing, OTU calling and preparation of OTU by sample tables

#unless noted, the same pipeline was used for 16S and ITS2 sequences, replacing the first letter of the file name from b to f

#place all fastq files in one folder

```
cp B*/Data/Intensities/BaseCalls/*.fastq.gz ~/Documents/GH16bact_fastqfiles
```

#merge paired reads (after decompression of .gz files)

```
usearch -fastq_mergepairs *_R1_*.fastq -relabel @ -fastqout bmerged.fq
```

#trimming gene specific primers after merging and removal of sequences without primers

#for 16S sequences

```
~/local/bin/cutadapt -g GTGYCAGCMGCCGCGGTAA -a ATTAGAWACCCBNGTAGTCC -e 0.1 --untrimmed-output=no_trim_bmerged.fastq --match-read-wildcards -o bmerged_trimm.fastq bmerged.fq
```

#for ITS2 sequences

```
~/local/bin/cutadapt -g CAHCGATGAAGAACGYDG -a GCATATCAATAAGCGSAGGA -e 0.1 --untrimmed-output=no_trim_fbmerged.fastq --match-read-wildcards -o fbmerged_trimm.fastq no_trim_bmerged.fastq
```

#OTU calling pipeline

```
usearch -fastq_filter bmerged_trimm.fastq -fastq_maxee 0.5 -fastq_minlen 200 -relabel Filt -fastaout bfiltered.fa
```

```
usearch -derep_fulllength bfiltered.fa -relabel Uniq -sizeout -fastaout bcuniques.fa
```

```
usearch -cluster_otus bcuniques.fa -minsize 2 -otus bcotus.fa -relabel Otu -sizeout -sizein
```

```
usearch -uchime_ref bcotus.fa -db refdb.fa -strand plus -minh 1.0 -nonchimeras bcotus_nonch.fa \
-uchimeout otus.uchime -uchimealn otus.aln
```

```
usearch -usearch_global bmerged_trimm.fastq -db bcotus_nonch.fa -strand plus -id 0.97 -otutabot botutab.txt -
biomout botutab.json
```

```
usearch -makeudb_utax refdb.fa -output brefdb.udb -taxconfsin 250.tc
```

```
usearch -utax bcotus_nonch.fa -db brefdb.udb -utaxout butax.txt -strand both -rdpout butaxrdp.txt -alnout baln.txt
```

#for ITS2 taxonomy assignment use Qiime's assign taxonomy and full Qiime-formatted Unite database

```
assign_taxonomy.py -i fcotus_treatments_seq.fasta -r unite_ref/sh_refs_qiime_ver7_97_s_20.11.2016.fasta -t
unite_ref/sh_taxonomy_qiime_ver7_97_s_20.11.2016.txt -m blas
```

#manually revise file and identify non-target OTUs for filtering. Incorporate into Qiime for filtering of non-target OTUs, low abundance OTUs, splitting into individual experiments and sequence count normalization

```
filter_otus_from_otu_table.py -i fcotush.biom -o fungi_only_fcotu_table -e otus_to_remove.txt
```



```

filter_samples_from_otu_table.py -i fungi_only_fcotu_table -o fungi_treat_only_table --sample_id_fp
control_samples.txt --negate_sample_id_fp

biom convert -i fungi_treat_only_table -o Fungi_otus_treatments_table_new.txt --to-tsv #treatment only, sequence
count file for alpha diversity analysis (R, phyloseq)

split_otu_table.py -i fungi_treat_only_table -m mapping_ITS_treat.csv -f Experiment -o by_experiment

#this point forward, for each gene region files were split per experiment (WCR, Fusarium 1 and Fusarium 2)
filter_otus_from_otu_table.py -i fungi_treat_only_table__Experiment_FUS1_0116.biom -n 10 -s 5 -o
fcotus_filt_Jan2017_Fus1

filter_samples_from_otu_table.py -i fcotus_filt_Jan2017_Fus1 -n 5 -o fcotus_filt_Jan2017_Fus1ed

normalize_table.py -i fcotus_filt_Jan2017_Fus1ed -o Fus1_F_filt_norm -a CSS -s --output_CSS_statistics

biom convert -i Fus1_F_filt_norm -o F1_F_filt_CSSnew.txt --to-tsv #normalized file used for beta diversity and other
statistical analyses in R (phyloseq and vegan)

#for Picrust analysis: require greengenes identification, obtained through Qiime's closed reference OTU picking
#perform pick closed reference otus in qiime using the defaults (as in picrust.github.io otu picking tutorial)
echo "pick_otus:enable_rev_strand_match True" >> otu_picking_params_97.txt

echo "pick_otus:similarity 0.97" >> otu_picking_params_97.txt

pick_closed_reference_otus.py -i bcfilted.fasta -p otu_picking_picking_params_97.txt -o bactc_cr_otus

# manually revise file and identify non-target OTUs for filtering, filter low abundance OTUs as above
filter_samples_from_otu_table.py -i otu_table.biom --sample_id_fp bcsample_list.txt -o otu_table_filtered

filter_otus_from_otu_table.py -i otu_table_filtered -o otu_table_bact_only_filt -n 10 -s 5 -e closedref_nobact_list.txt

#convert to biom json format for compatibility with picrust and to text file for comparison with results of usearch OTU
picking
biom convert -i otu_table_bact_only_filt -o bact_only_table_f_json.biom --table-type "OTU table" --to-json

biom convert -i otu_table_bact_only_filt -o bact_only_table_f.txt --to-tsv --header-key taxonomy

#run Picrust, integrated into bioBakery
normalize_by_copy_number.py -i bact_only_table_json.biom -o normalized_apr06.biom

predict_metagenomes.py -i normalized_apr06.biom -o apr_metagenome_predictions.biom -a apr_nsti_per_sample.tab
--with_confidence #-f option generates a text version of the file to be integrated into R (phyloseq, vegan)

categorize_by_function.py -i apr_metagenome_predictions.biom -o apr_by_function_Kegg.txt -c KEGG_Pathways -l 3

```

```
categorize_by_function.py -i apr_metagenome_predictions.biom -o apr_by_Kegg_1.txt -c KEGG_Pathways -l 1
```
